# Supplementary material for: Complete Human Penile Scaffold for Composite Tissue Engineering: Organ Decellularization and Characterization
Source: PubMed Central journal article supplement (PMC6841966; doi:10.1038/s41598-019-51794-6), 2019-11-08
Supplement: 41598_2019_51794_MOESM1_ESM.pdf [file 41598_2019_51794_MOESM1_ESM.pdf]

## **Complete Human Penile Scaffold for Composite Tissue Engineering: Organ Decellularization and Characterization**

### **Authors:**

Yu Tan PhD<sup>1,2</sup>; Wilmina N. Landford, MD<sup>1,2</sup>; Matthew Garza, BA<sup>1,2</sup>; Allister Suarez, PhD<sup>1,2</sup>; Zhengbing, Zhou<sup>3</sup>; \*Devin Coon MD, MSE<sup>1,2</sup>

<sup>1</sup> Department of Plastic & Reconstructive Surgery, Johns Hopkins University School of Medicine, 600 N Wolfe Street, Baltimore, Maryland, USA, 21287

<sup>2</sup> Translational Tissue Engineering Center, Department of Biomedical Engineering, Johns Hopkins University Whiting School of Engineering, Baltimore, Maryland, USA

<sup>3</sup> Department of Hand & Microsurgery, Xiangya Hospital of Central South University, 87 Xiangya Road, Changsha, Hunan Province, P. R. China, 410008

\*Corresponding Author

Devin Coon MD, MSE

Department of Plastic & Reconstructive Surgery,

Johns Hopkins University School of Medicine

Translational Tissue Engineering Center, Department of Biomedical Engineering,

Johns Hopkins University Whiting School of Engineering

600 N Wolfe Street

Carnegie, 136

Baltimore, MD 21287

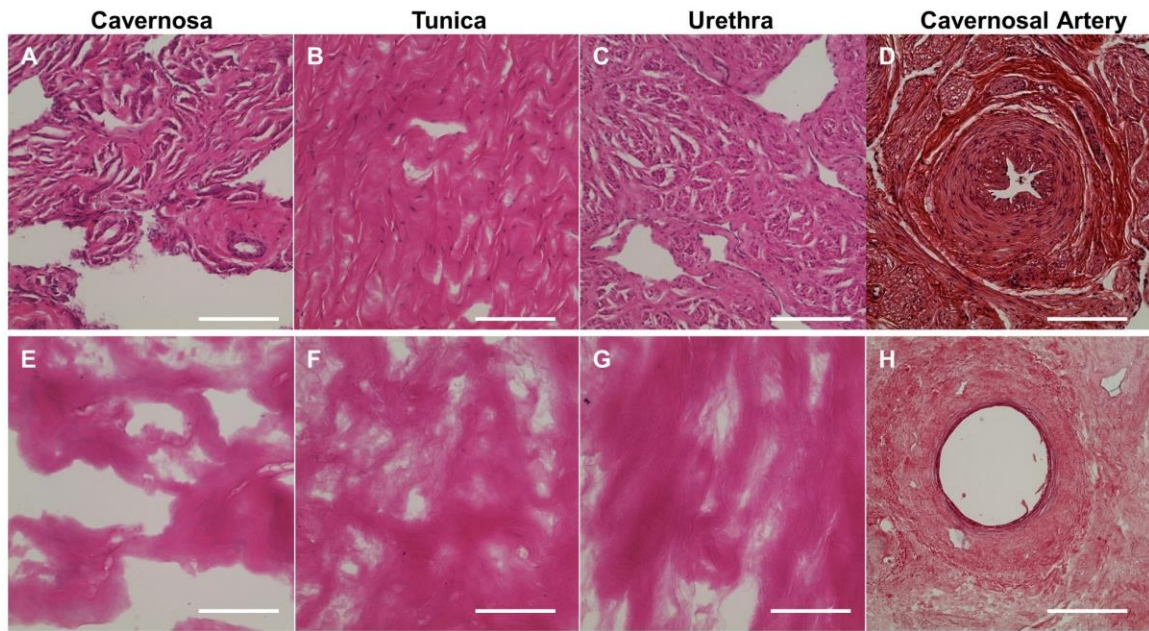

**Supplementary Figure 1. H&E staining for characterization of decellularization across each anatomical unit. (A-D) before and (E-H) after decellularization in cavernosa, tunica, urethra and cavernosal artery respectively. Scale bar:200 $\mu$ m.**

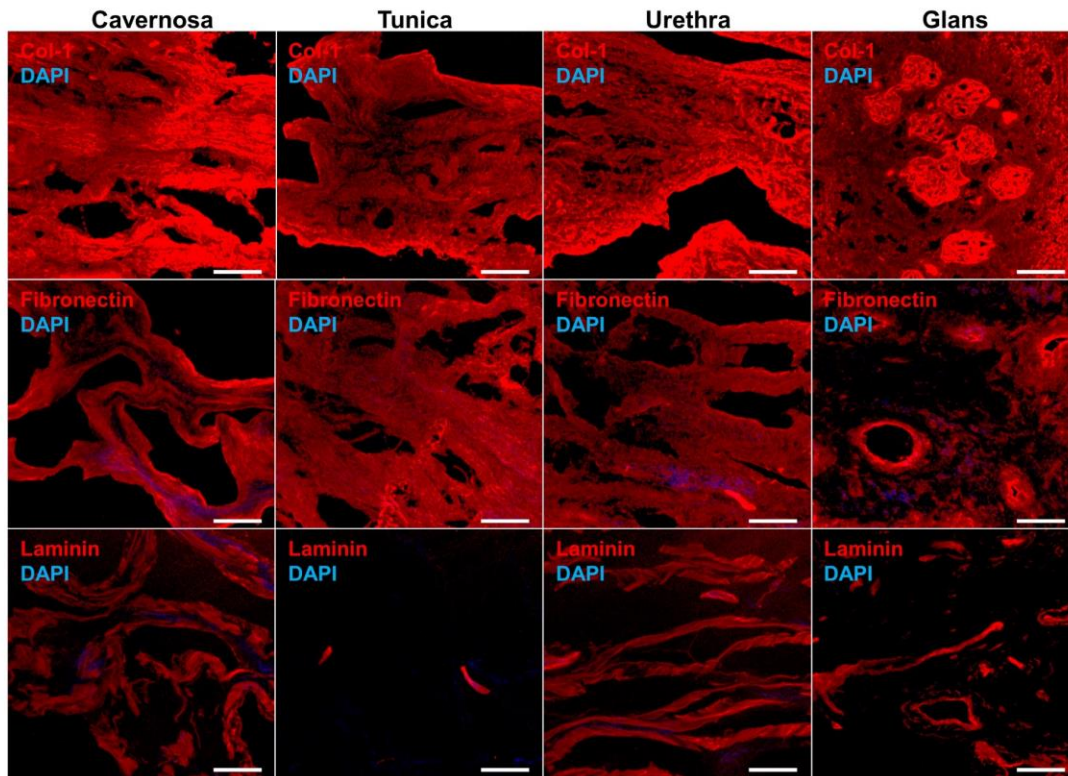

**Supplementary Figure 2. Immunofluorescence staining of decellularized penile scaffold across each anatomical unit.** Immunofluorescent staining of ECM proteins (Collagen-1, Fibronectin and Laminin) after decellularization in the cavernosa, tunica albuginea, urethra, and glans. Scale bar:100 $\mu$ m.

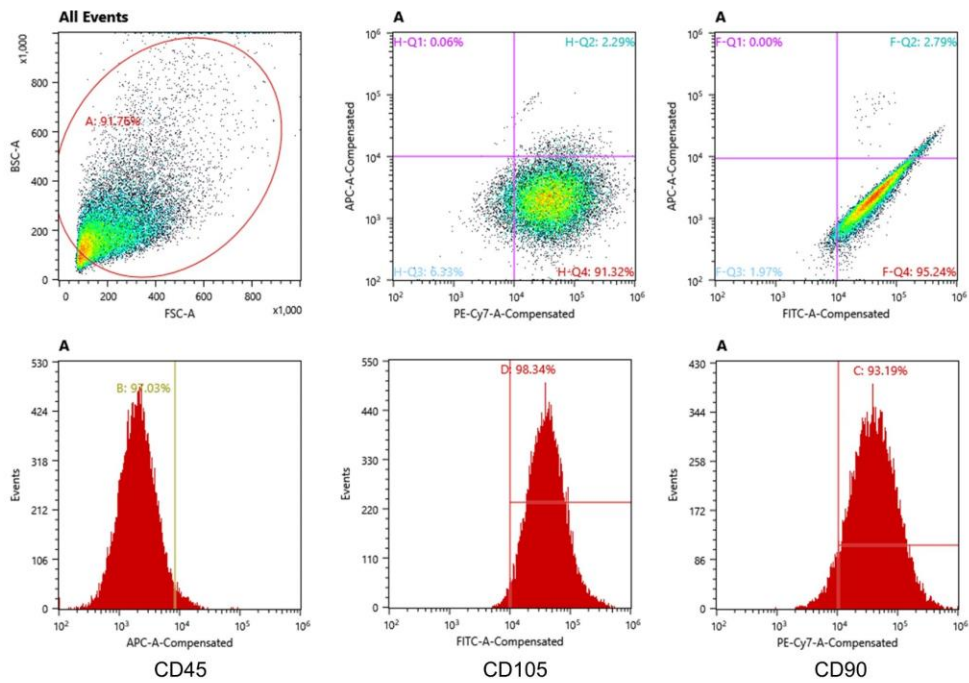

**Supplementary Figure 3. Flow cytometry of ADSC cells used for scaffold reseeding.** Flow cytometry data showed that SVFs obtained from human adipose tissue were negative for CD45 (97.03%) and positive for CD105 (98.34%) and CD90 (93.19%).

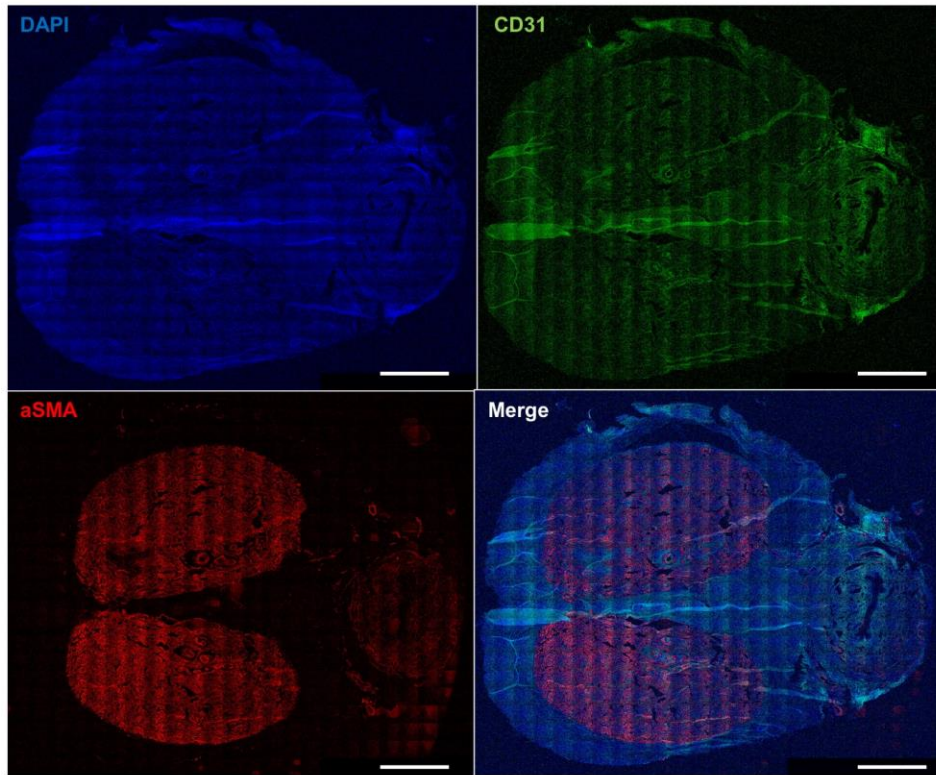

**Supplementary Figure 4. Immunofluorescent staining of cross section of whole penis.** Immunofluorescent staining of cross section of native penis tissue with endothelial cell marker (CD31) and smooth muscle cell marker (aSMA). Scale bar: 5mm.
